# Supplementary figures and images for: DNA translocation mechanism of an XPD family helicase
Source: eLife journal article supplement (doi:10.7554/elife.42400), 2018-12-06

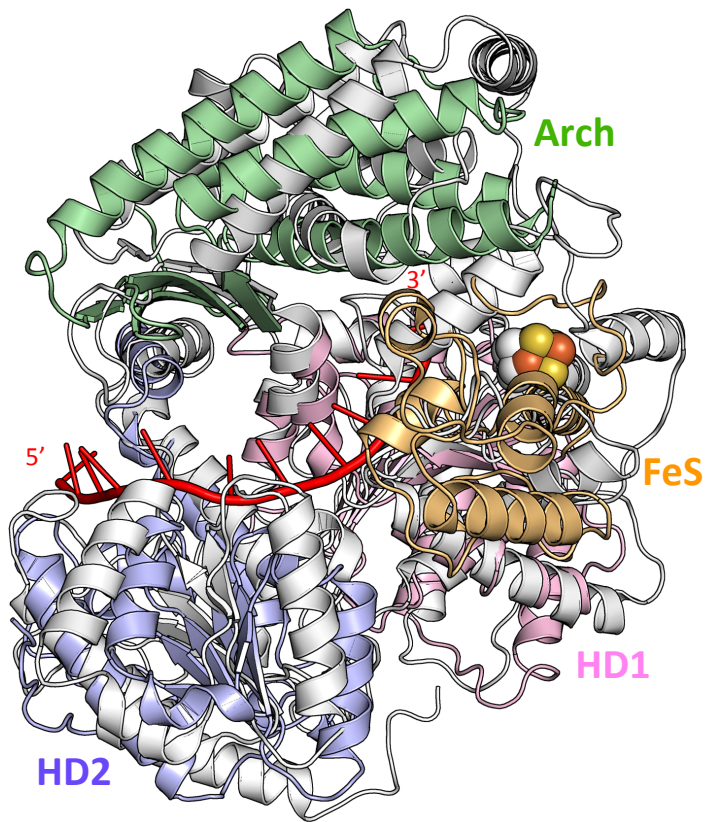

Supplement: supp [file elife_poa_e42400_Figure_1_figure_supplement_2.pdf › elife_poa_e42400_Figure_1_figure_supplement_2.pdf]

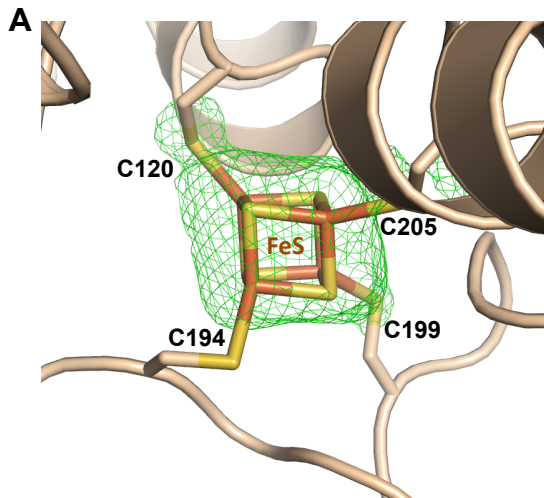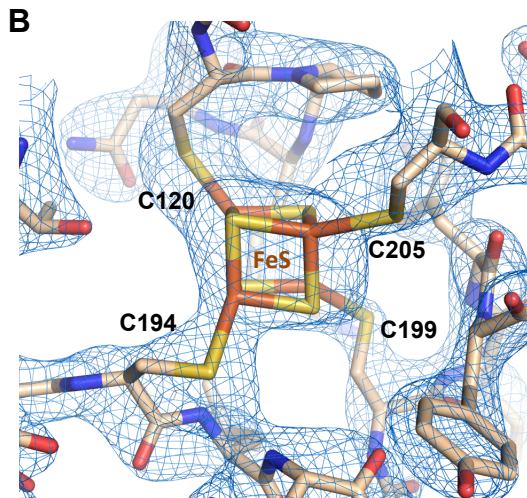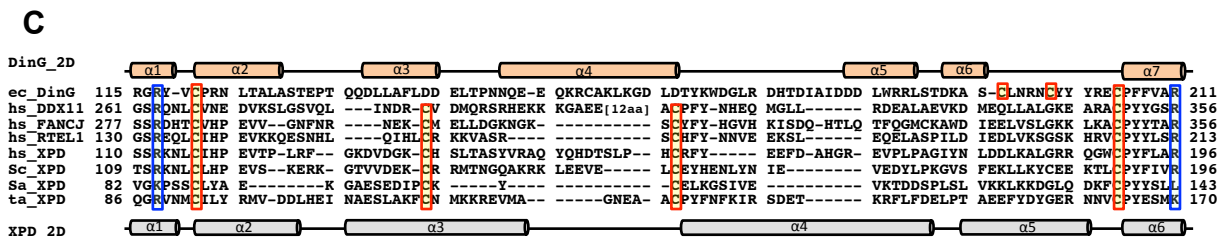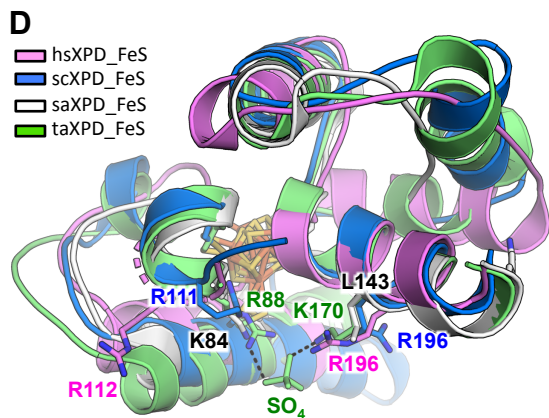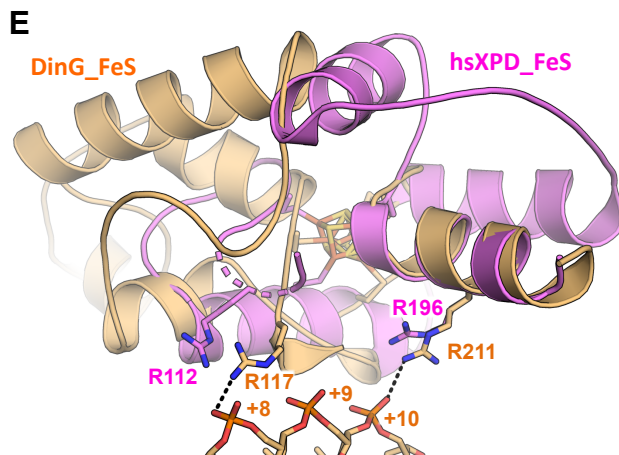

Supplement: supp [file elife_poa_e42400_Figure_1_figure_supplement_3.pdf › elife_poa_e42400_Figure_1_figure_supplement_3.pdf]

**A**

DinG-DNA  
(dT11)

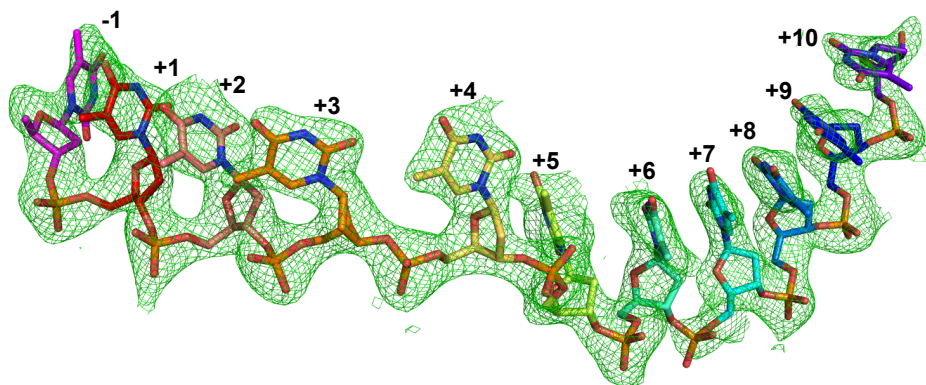

DinG-DNA  
(dT11)

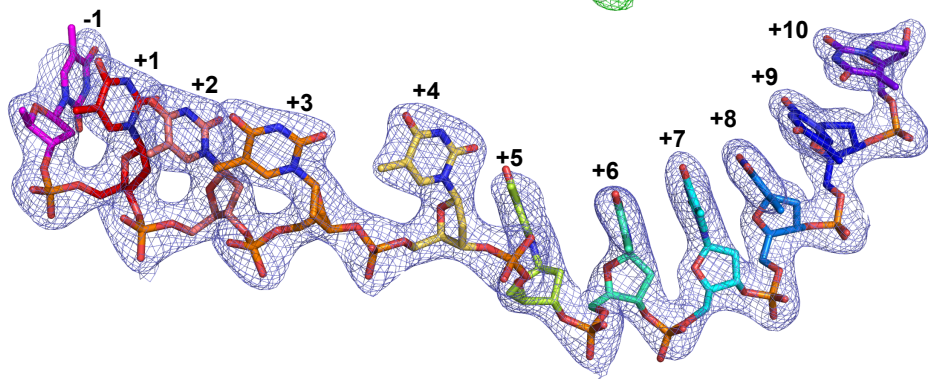**B**

DinG-DNA-ADP•BeF<sub>3</sub>  
(dT10)

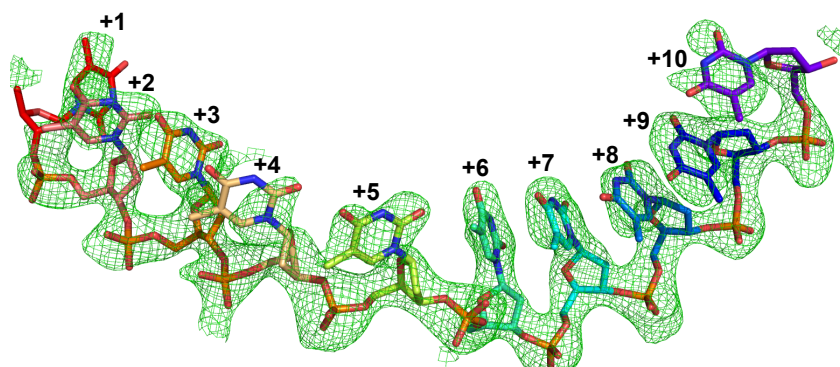

DinG-DNA-ADP•BeF<sub>3</sub>  
(dT10)

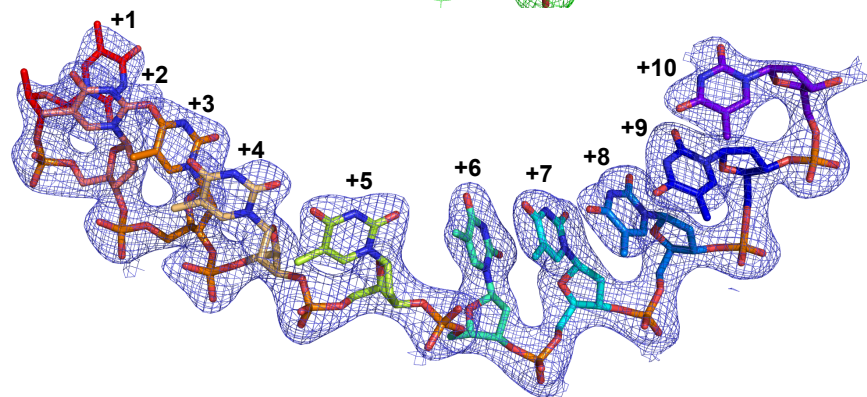

Supplement: supp [file elife_poa_e42400_Figure_2_figure_supplement_1.pdf › elife_poa_e42400_Figure_2_figure_supplement_1.pdf]

**A**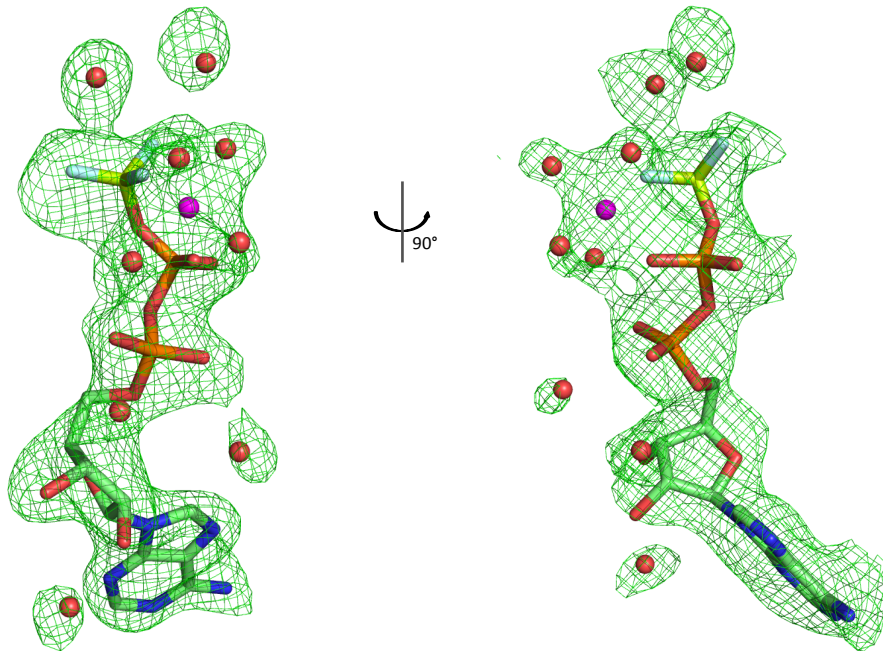**B**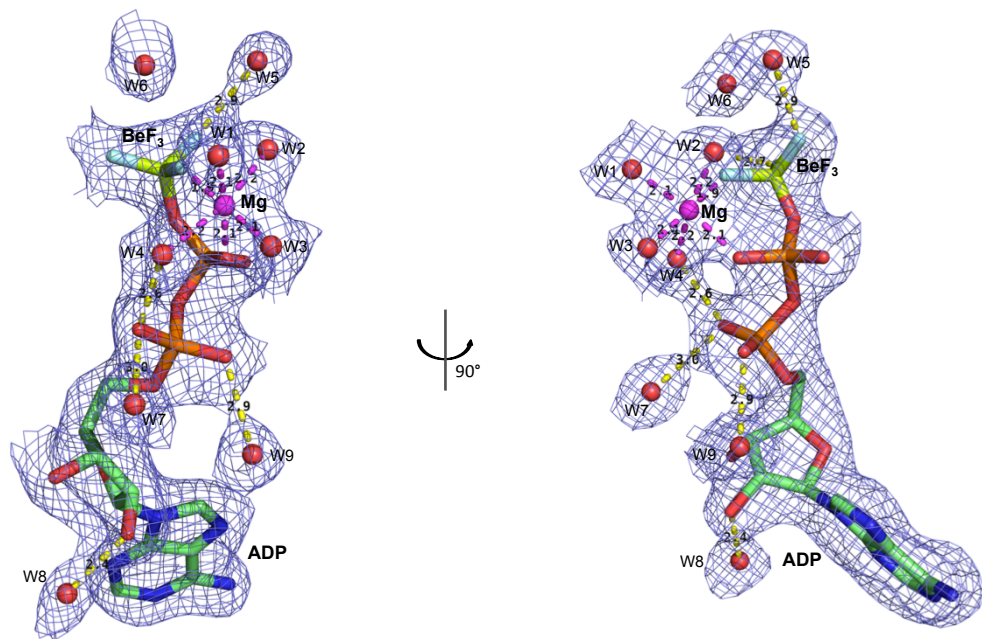

Supplement: supp [file elife_poa_e42400_Figure_2_figure_supplement_2.pdf › elife_poa_e42400_Figure_2_figure_supplement_2.pdf]

**A**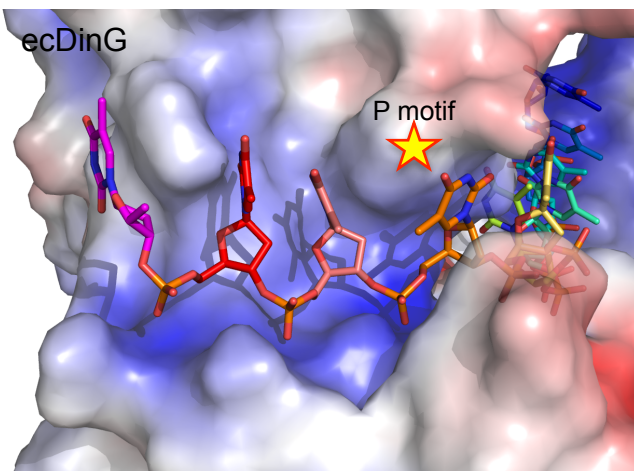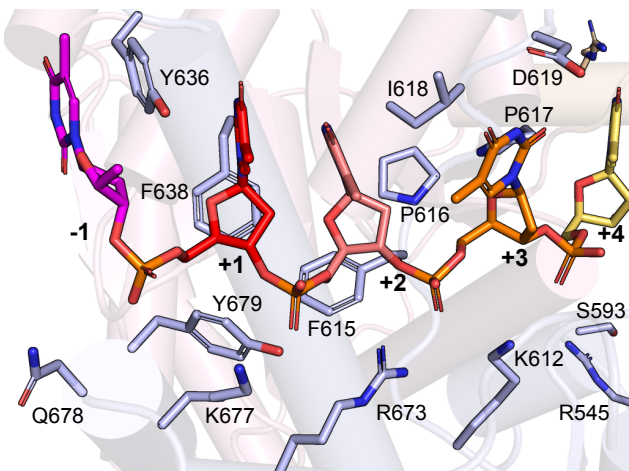**B**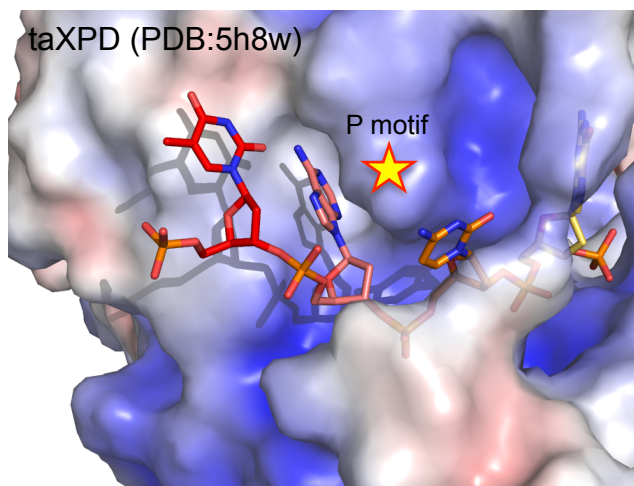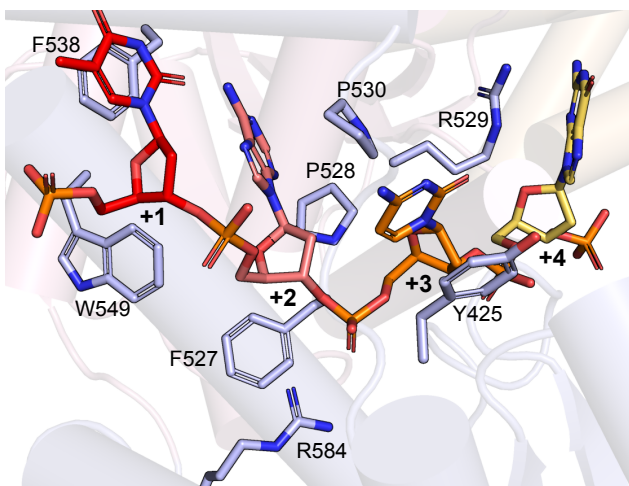**C**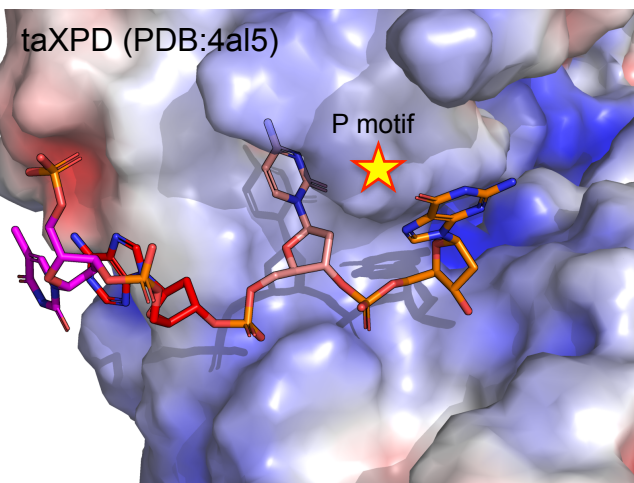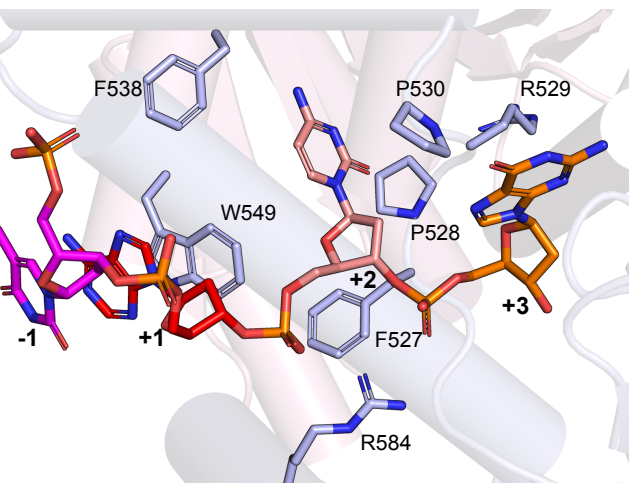

Supplement: supp [file elife_poa_e42400_Figure_2_figure_supplement_3.pdf › elife_poa_e42400_Figure_2_figure_supplement_3.pdf]

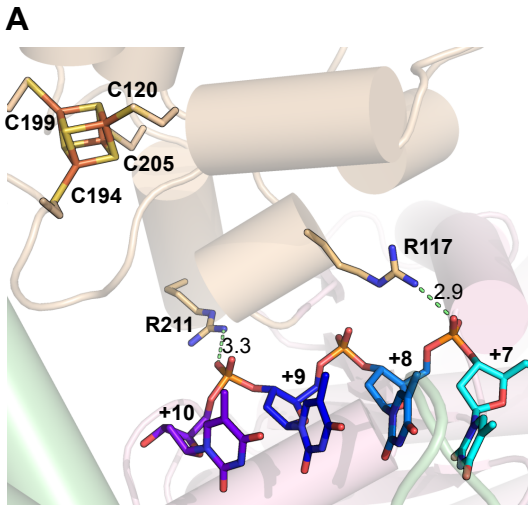

FeS domain of DinG

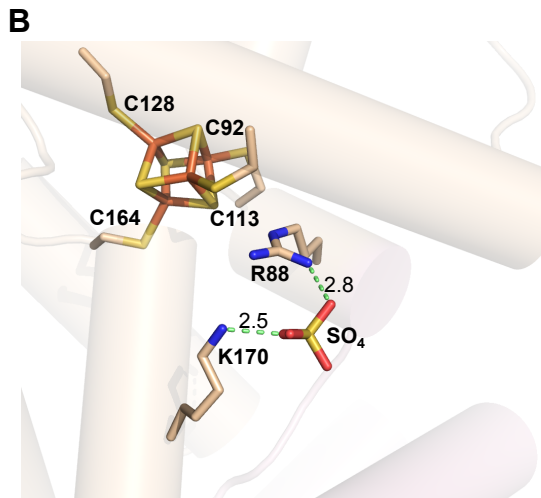

FeS domain of taXPD

Supplement: supp [file elife_poa_e42400_Figure_2_figure_supplement_4.pdf › elife_poa_e42400_Figure_2_figure_supplement_4.pdf]

**A**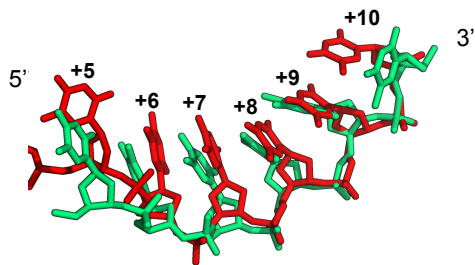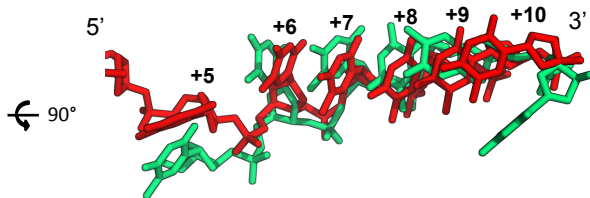**B**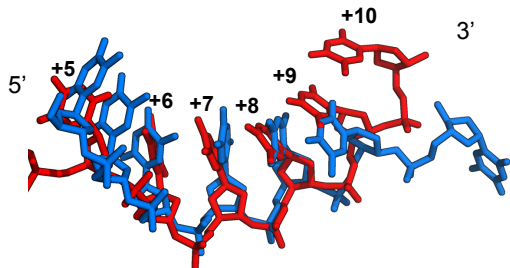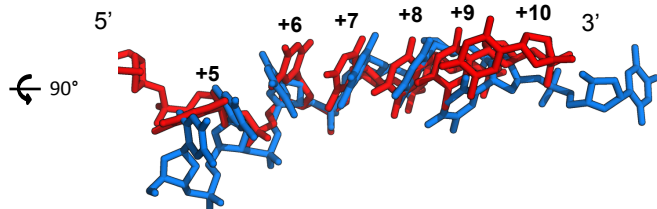**C**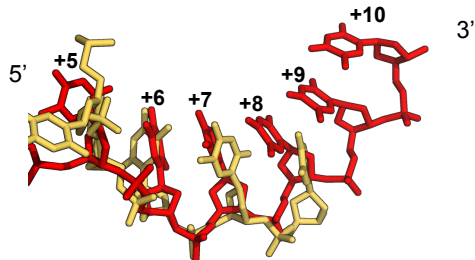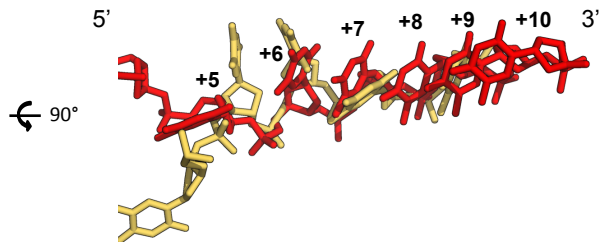

DinG (PDB:6FWS)  
NS3 (PDB:3KQL)  
RecD2 (PDB:3GPL)  
PcrA (PDB:3PJR)

Supplement: supp [file elife_poa_e42400_Figure_2_figure_supplement_5.pdf › elife_poa_e42400_Figure_2_figure_supplement_5.pdf]

**A**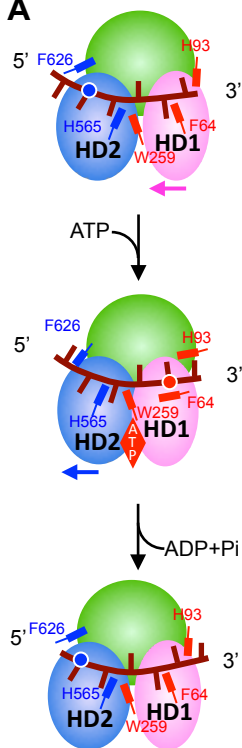**PcrA (SF1, 3'-5')****B**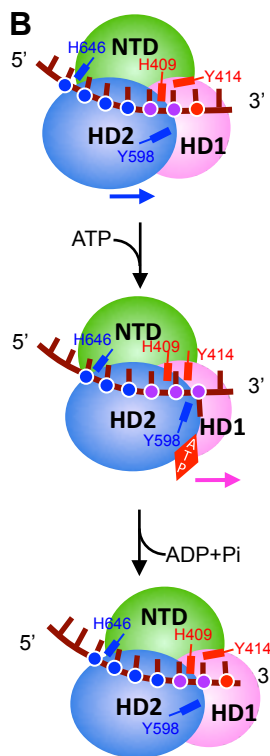**RecD2 (SF1, 5'-3')****C**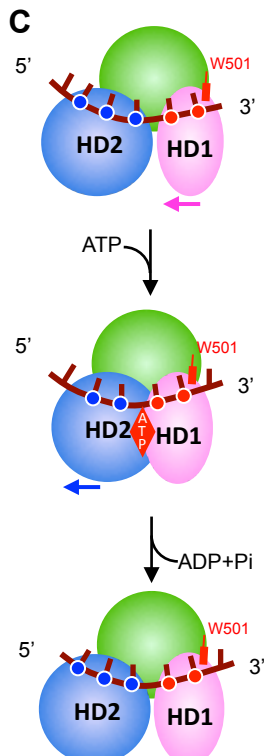**NS3 (SF2, 3'-5')****D**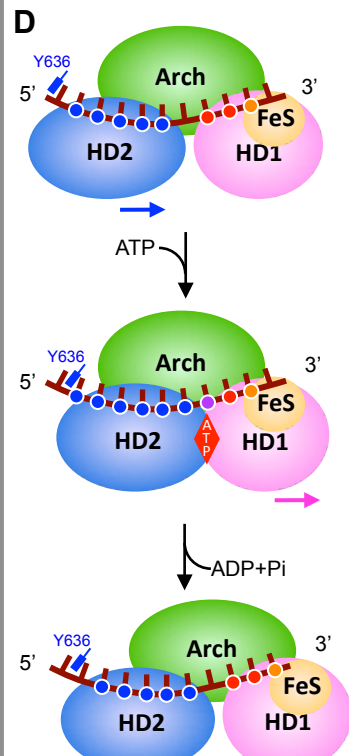**DinG (SF2, 5'-3')**

Supplement: supp [file elife_poa_e42400_Figure_3_figure_supplement_1.pdf › elife_poa_e42400_Figure_3_figure_supplement_1.pdf]

# DNA binding assays

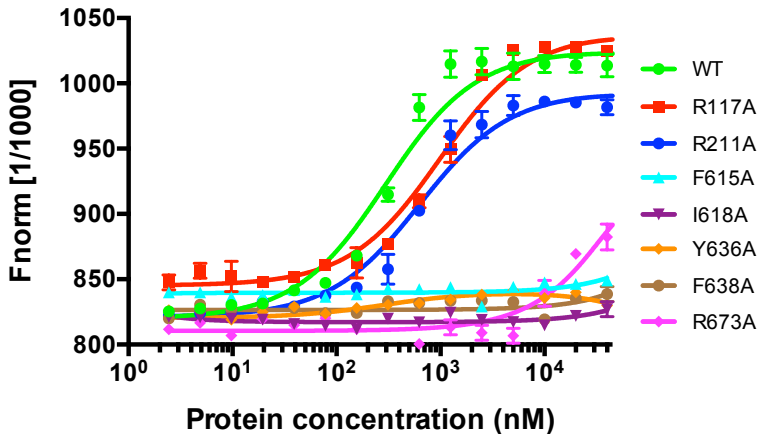

Supplement: supp [file elife_poa_e42400_Figure_4_figure_supplement_1.pdf › elife_poa_e42400_Figure_4_figure_supplement_1.pdf]

**A**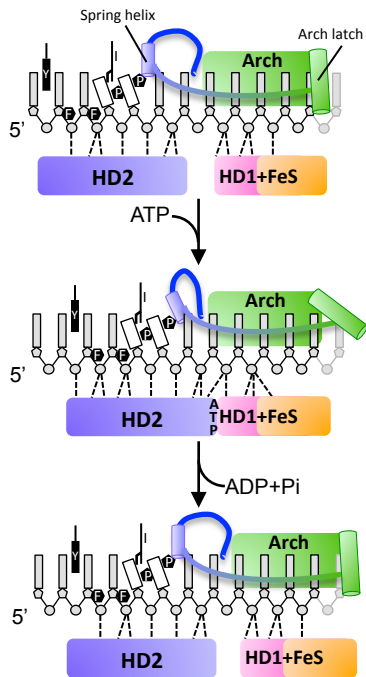**B**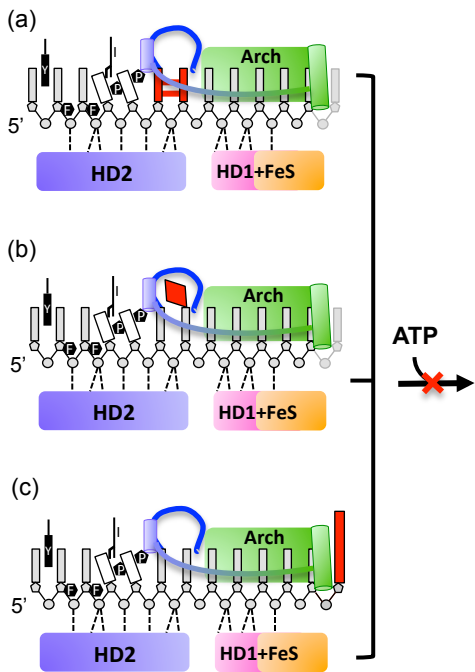

Supplement: supp [file elife_poa_e42400_Figure_5_figure_supplement_1.pdf › elife_poa_e42400_Figure_5_figure_supplement_1.pdf]
